# Supplementary material for: Highly conductive poly(3,4-ethylenedioxypyrrole) and poly(3,4-ethylenedioxythiophene) enwrapped Sb2S3nanorods for flexible supercapacitors
Source: Royal Society of Chemistry journal article supplement (doi:10.1039/c3cp53554a), 2013-12-17
Supplement: c3cp53554a.pdf [file c3cp53554a.pdf]

## Highly Conductive Poly(3,4-ethylenedioxythiophene) and Poly(3,4-ethylenedioxythiophene) Enwrapped $\text{Sb}_2\text{S}_3$ Nanorods for Flexible Supercapacitors

B. Narsimha Reddy<sup>a</sup>, Melepurath Deepa,<sup>a,\*</sup> Amish G. Joshi<sup>b</sup>

### Electronic Supplementary Information

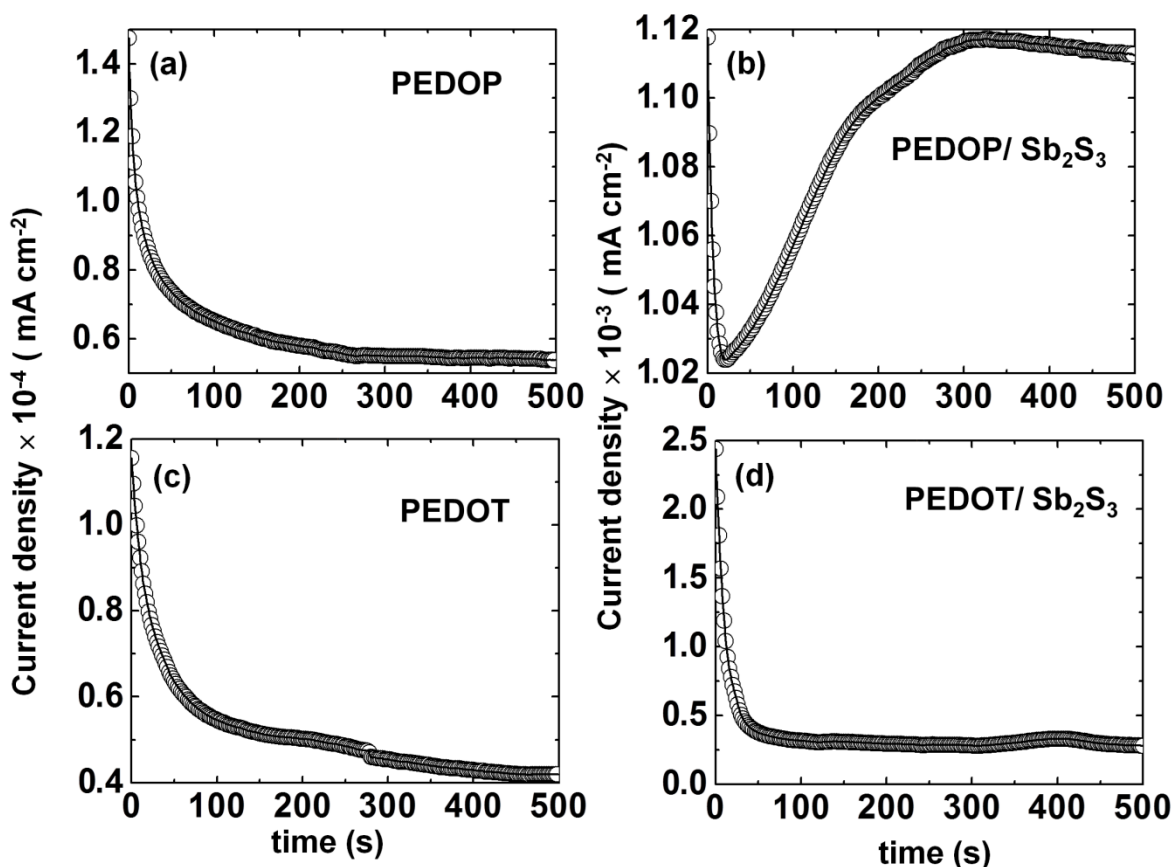

**Figure S1** Current density *versus* time transients recorded for the oxidative electro-synthesis of PEDOP, PEDOT films and their composites PEDOP/ $\text{Sb}_2\text{S}_3$ , PEDOT/ $\text{Sb}_2\text{S}_3$  from solutions of (a) 0.1 M 3,4-EDOP (b) 0.1 M 3,4-EDOP/ 1 mg  $\text{Sb}_2\text{S}_3$  and (c) 0.1 M 3,4-EDOT (d) 0.1 M 3,4-EDOT/ 1 mg  $\text{Sb}_2\text{S}_3$  both in AN and each containing the ionic liquid: 0.1 M 1-butyl-3-methylimidazolium tris(pentafluoroethyl)trifluorophosphate.

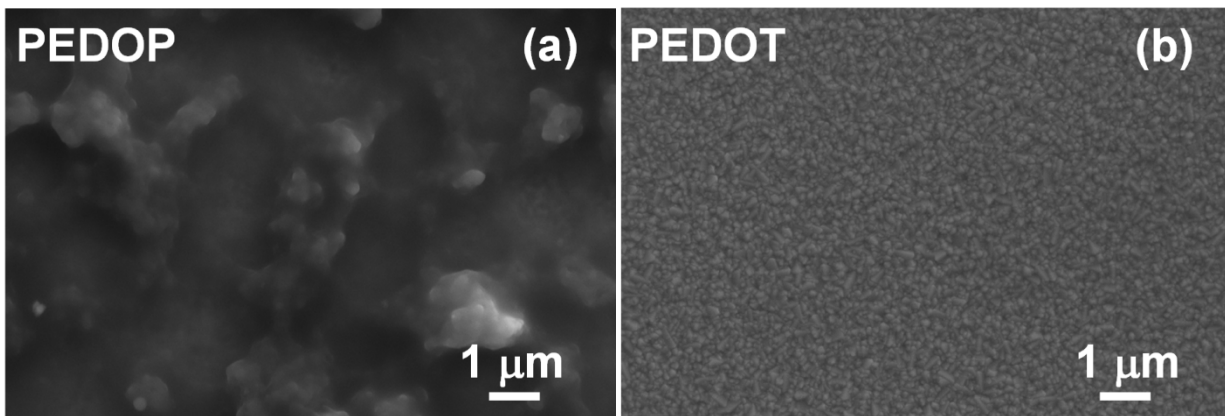

**Figure S2** SEM images of (a) PEDOP and (b) PEDOT films.

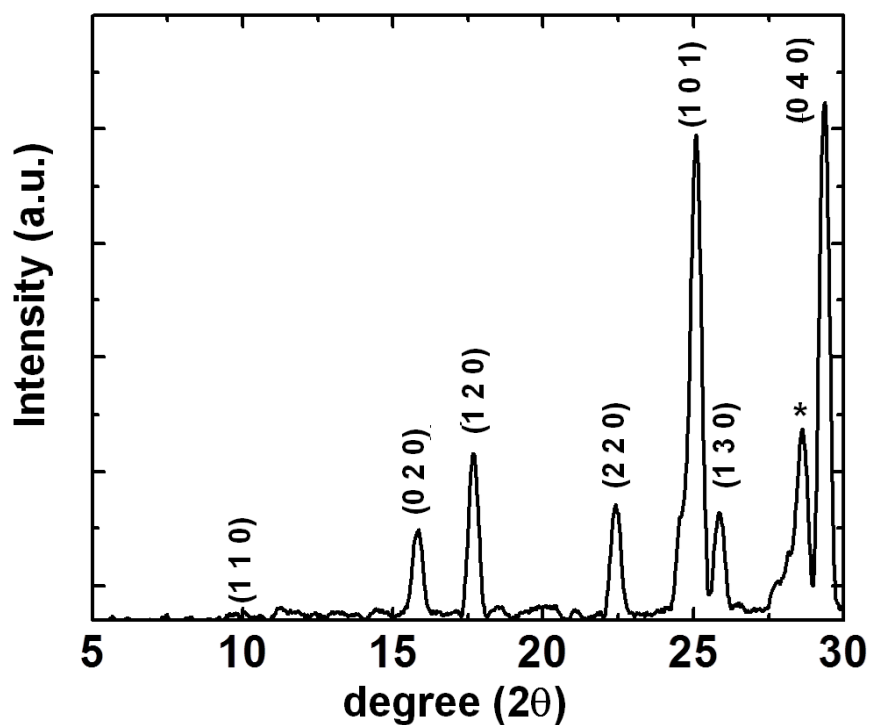

**Figure S3** X-ray diffraction pattern of  $\text{Sb}_2\text{S}_3$  nanorods; the asterisk marked peak arises from the substrate.

The XRD pattern of  $\text{Sb}_2\text{S}_3$  nanorods shows main peaks at  $d = 7.86, 5.70, 4.97, 3.95$  and  $3.5$  nm corresponding to the (020), (120), (220), (101) and (040) planes of orthorhombic  $\text{Sb}_2\text{S}_3$ , as per the JCPDS file number 42-1393. No peaks of any other phases were detected, indicating that the nanorods sample is a high-purity, single-phase sample.

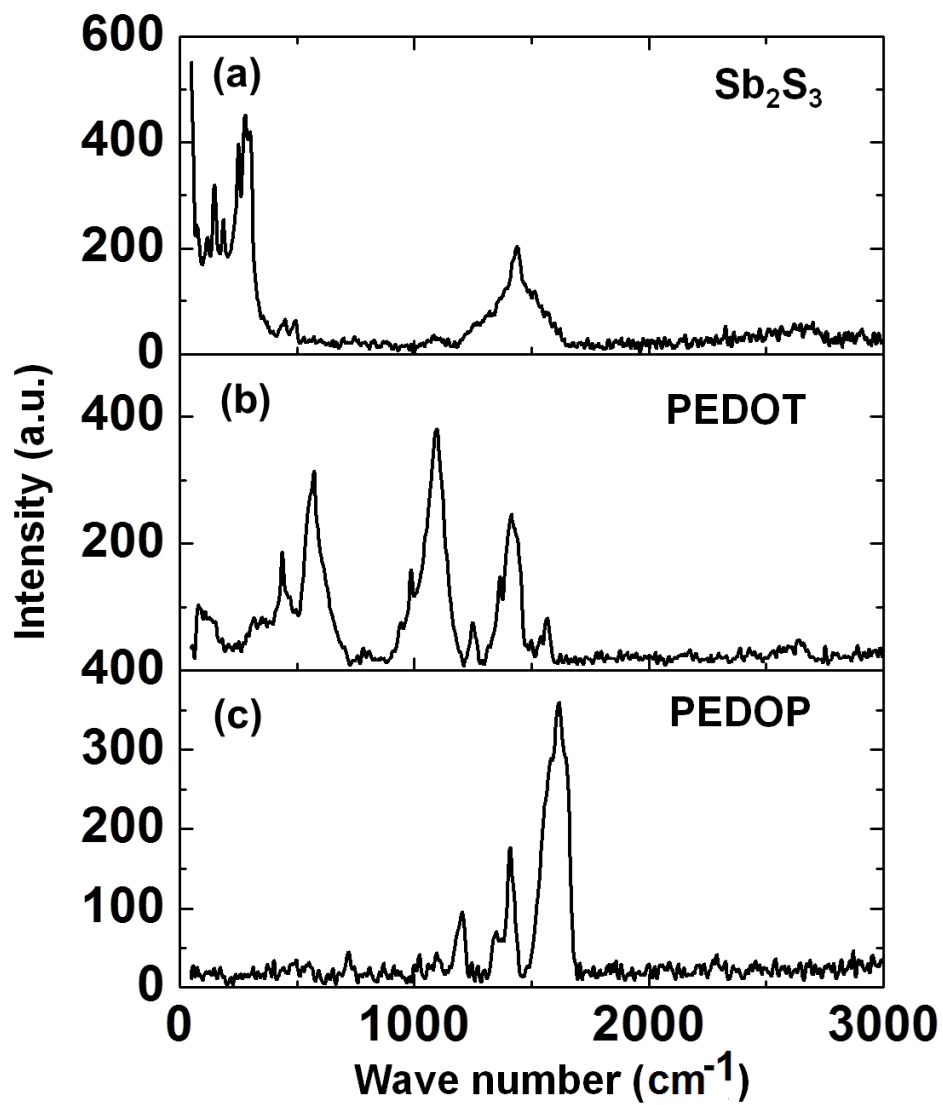

**Figure S4** Raman spectra of (a) Sb<sub>2</sub>S<sub>3</sub> nanorods, (b) neat PEDOT and (c) neat PEDOP films.

**Table S1** Band positions and assignments for neat PEDOP and neat PEDOT films ( $\nu$ : stretching,  $\nu_{\text{asy}}$ : asymmetric stretching and  $\delta$ : bending modes).

| PEDOT<br>( $\text{cm}^{-1}$ ) | PEDOP<br>( $\text{cm}^{-1}$ ) | Assignment                                          |
|-------------------------------|-------------------------------|-----------------------------------------------------|
| 2627                          | —                             | $\nu(\text{C}=\text{C}-\text{H})$                   |
| —                             | 2095                          | $\nu(-\text{C}-\text{H})$                           |
| 1650                          | 1641                          | $\nu(\text{C}=\text{C})$                            |
| 1562                          |                               | $\nu_{\text{asy}}(\text{C}=\text{C})$               |
| 1422                          |                               | $\nu(\text{C}_{\alpha}=\text{C}_{\beta})$           |
| 1355                          | 1405                          | $\nu(\text{C}_{\beta}-\text{C}_{\beta})$            |
| 1249                          |                               | $\nu(\text{C}_{\alpha}-\text{C}_{\alpha})$          |
| 1230                          | 1290                          | $\nu(\text{C}-\text{S}), \nu(\text{C}-\text{N})$    |
| 1077                          | —                             | $\delta(\text{C}-\text{O}-\text{C})$                |
| 845                           | 820                           | $\nu(\text{P}-\text{F})$ (from ionic liquid dopant) |
|                               | 733                           | $\nu(\text{N}-\text{H})$                            |
| 519                           |                               | $\delta(\text{C}-\text{S}-\text{C})$                |

$\text{Sb}_2\text{S}_3$  nanorods show peaks at  $269 \text{ cm}^{-1}$  and  $295 \text{ cm}^{-1}$ , corresponding to the stretching vibrations of the Sb-S bond.<sup>1</sup>

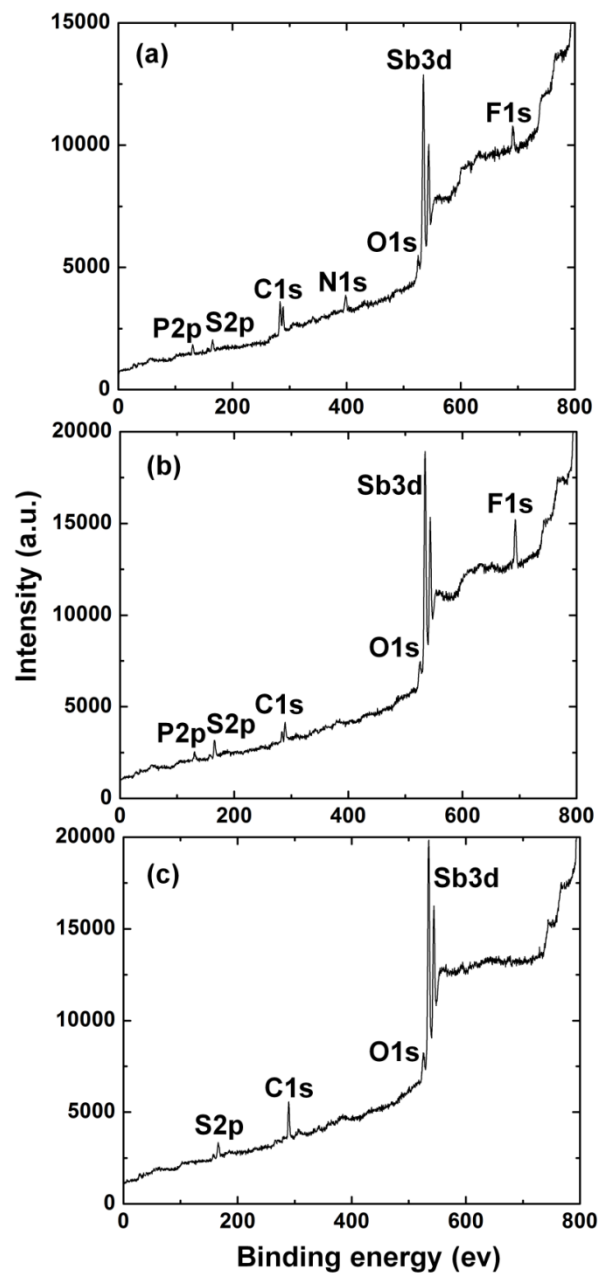

**Figure S5** Survey spectra of (a) PEDOP-Sb<sub>2</sub>S<sub>3</sub>, (b) PEDOT-Sb<sub>2</sub>S<sub>3</sub> and (c) Sb<sub>2</sub>S<sub>3</sub> illustrating the different elemental contributions in each sample.

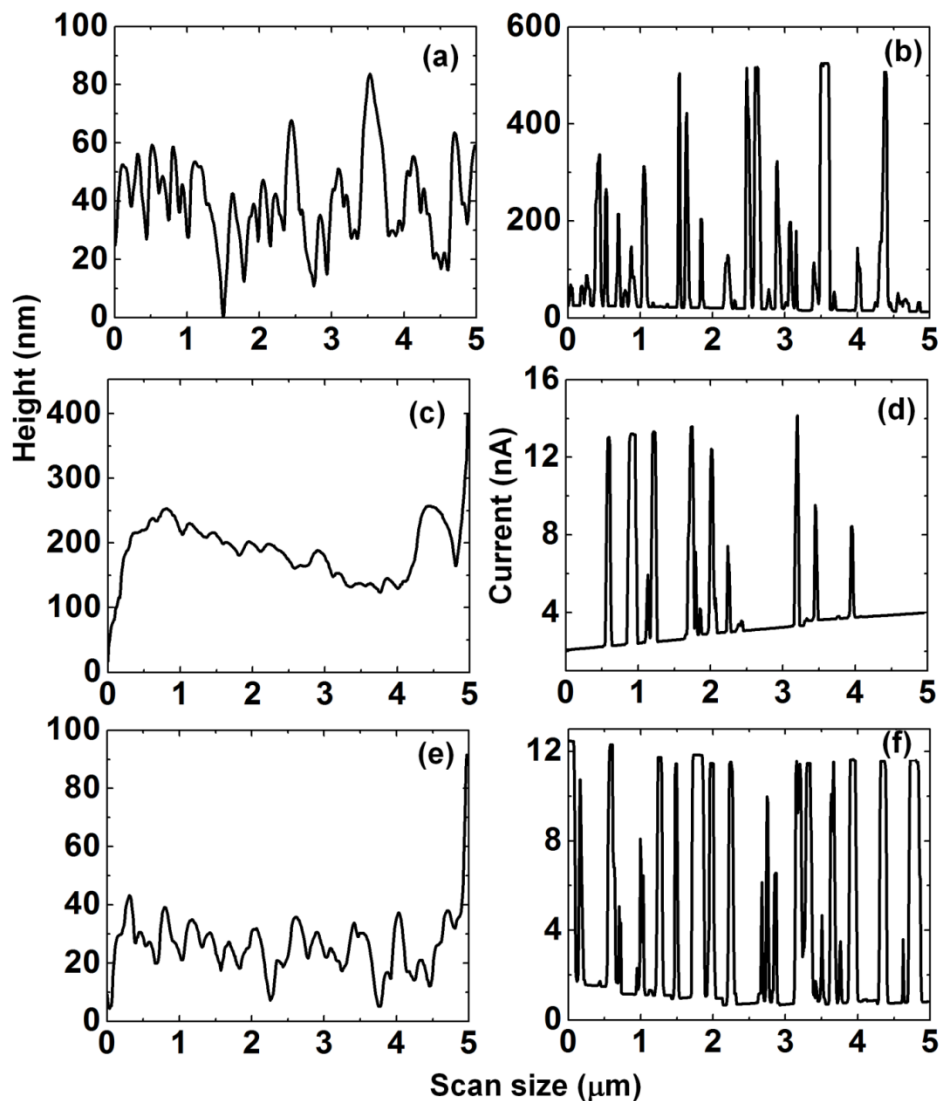

**Figure S6** Cross section profiles of topography and current images of (a, b) Sb<sub>2</sub>S<sub>3</sub> nanorods, (d,e) PEDOP/Sb<sub>2</sub>S<sub>3</sub> and (g,h) PEDOT/Sb<sub>2</sub>S<sub>3</sub> films recorded over scanned areas of 5 μm × 5 μm (corresponding to the images in Figure 5).

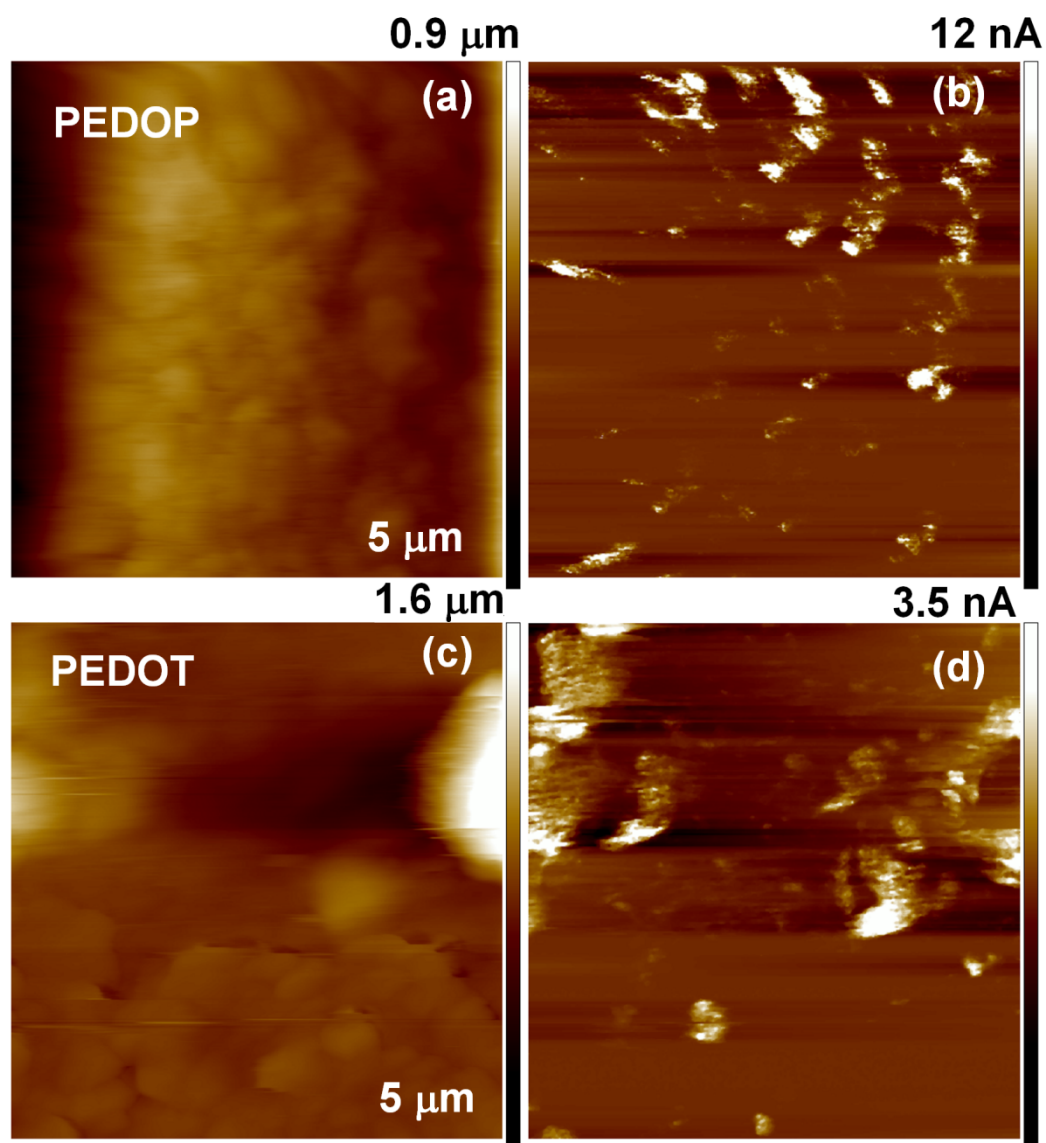

**Figure S7** Simultaneous topography and current images of (a, b) neat PEDOP and (c, d) neat PEDOT films recorded over scanned areas of  $5 \mu\text{m} \times 5 \mu\text{m}$ .

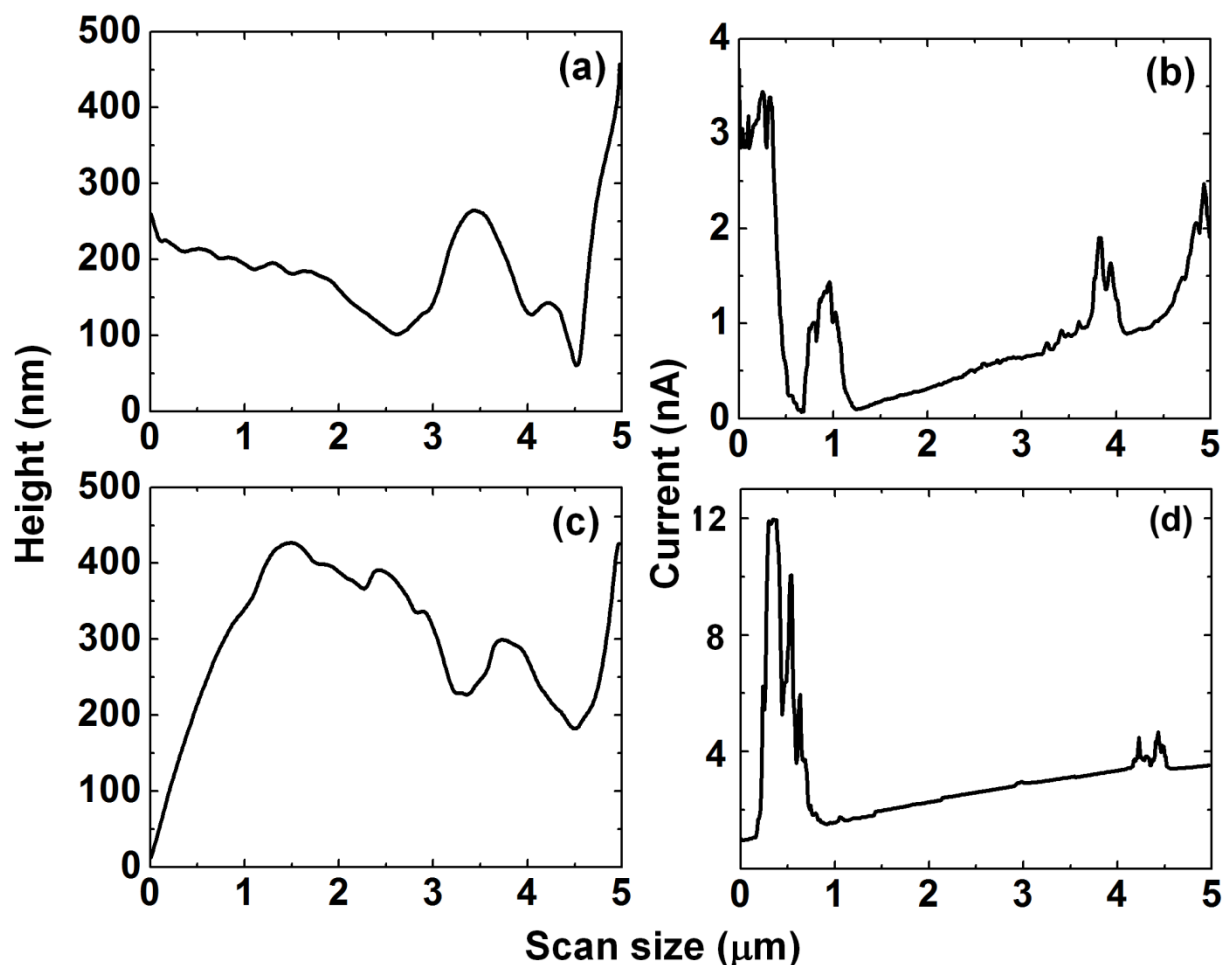

**Figure S8** Cross section profiles of topography and current images of (a, b) neat PEDOP and (c, d) neat PEDOT films recorded over scanned areas of  $5 \mu\text{m} \times 5 \mu\text{m}$  (corresponding to the images a-d in Figure S7).

### C-AFM details

The difference in the topography ongoing from Figure 5a and d to Figure 1 for the same samples ( $\text{Sb}_2\text{S}_3$ , PEDOP/ $\text{Sb}_2\text{S}_3$  and PEDOT/ $\text{Sb}_2\text{S}_3$  films) arises from the different modes used for making the measurement; and the method of measurement: contact mode in C-AFM and tapping mode in conventional topography, cannot be changed. Since the samples are soft (relative to a hard surface like that of a metal) better quality images are obtained in tapping mode compared to contact mode (C-AFM). In contact mode, the tip touches the samples and if sample



is soft, the image quality is affected. In tapping-mode, the instrument measures topography by tapping the surface with an oscillating probe tip so that the tip makes contact with the sample only for short duration in each oscillation cycle. The method of operation results in lower lateral forces compared to conventional contact mode in which the probe slides across the surface, so the irreversible destruction on soft surface can be eliminated. For this reason, TM-AFM (Tapping mode-AFM) has been established as a standard tool to investigate surfaces of soft materials.<sup>2</sup> And therefore the topography image obtained in Figure 1 is truly representative of the samples, as it is non-destructive.

**Table S2** Impedance parameters for different working electrodes, with graphite as the counter electrode, determined from Figure 8.

| Sample                                                   | $R_{CT}$ ( $\Omega$ ) | $R_{\Sigma}$ ( $\Omega$ ) | $C_{dl}$ ( $\mu F$ ) |
|----------------------------------------------------------|-----------------------|---------------------------|----------------------|
| PEDOP                                                    | 296                   | 240                       | 51                   |
| PEDOP/Sb <sub>2</sub> S <sub>3</sub>                     | 55                    | 9                         | 48                   |
| PEDOP/Sb <sub>2</sub> S <sub>3</sub> (after 1000 cycles) | 67                    | 3                         | 61                   |
| PEDOT                                                    | 80                    | 18                        | 47                   |
| PEDOT/Sb <sub>2</sub> S <sub>3</sub>                     | 50                    | 3                         | 45                   |
| PEDOT/Sb <sub>2</sub> S <sub>3</sub> (after 1000 cycles) | 63                    | 6                         | 60                   |

### Capacitance calculation:

The capacitances of conducting polymer films and composite films were calculated as follows. First, taken the weight of a well-cleaned FTO glass substrate (of area 2 cm × 2 cm) by using Sartorius electrical weighing balance (resolution of the balance = 0.1mg). Then the conducting polymer or composite was electrodeposited on substrate and dried for few hours. Then the weight of the (film+substrate) was measured. Subtraction of the former from the latter gave the actual weight of conducting polymer or composite film.

Final weights of PEDOT = weight of PEDOP = 0.8 mg.

Final weight of PEDOT/Sb<sub>2</sub>S<sub>3</sub> = weight of PEDOP/Sb<sub>2</sub>S<sub>3</sub> film = 1.2 mg

The specific capacitance of the polymer or composite based cells were calculated from slopes of the discharge curves and by using the following equation.

$$C = i \times \Delta t / \Delta V \times m$$

$C$  is the specific capacitance,  $i$  is the current applied for discharge,  $\Delta t$  is the time in seconds for discharge,  $\Delta V$  is voltage window and  $m$  is mass of active material of the working electrode.

For example, specific capacitance calculation for PEDOP/Sb<sub>2</sub>S<sub>3</sub> film is,

$$\begin{aligned} C &= 1.2 \text{ mA} \times 1209 \text{ s} / 1 \text{ V} \times 1.2 \text{ mg} \\ &= \sim 1007 \text{ F g}^{-1} \end{aligned}$$

Specific capacitance calculation for PEDOP film:

$$\begin{aligned} C &= 0.8 \text{ mA} \times 574 \text{ s} / 1 \text{ V} \times 0.8 \text{ mg} \\ &= \sim 717 \text{ F g}^{-1} \end{aligned}$$

Specific capacitance calculation for PEDOT/Sb<sub>2</sub>S<sub>3</sub> film:

$$\begin{aligned} C &= 1.2 \text{ mA} \times 996 \text{ s} / 1 \text{ V} \times 1.2 \text{ mg} \\ &= \sim 830 \text{ F g}^{-1} \end{aligned}$$

Specific capacitance calculation for PEDOT film:

$$\begin{aligned} C &= 0.8 \text{ mA} \times 504 \text{ s} / 1 \text{ V} \times 0.8 \text{ mg} \\ &= \sim 630 \text{ F g}^{-1} \end{aligned}$$

## References

1. C. An, K. Tang, Q. Yang and Y. Qian, *Inorg. Chem.* 2003, **42**, 8081–8086.
2. Y. Wang, Song, R. Y. Li and J. Shen, *Surf. Sci.* 2003, **530**, 136–148.
